# Supplementary material for: Structural Features of Eu3+ and Tb3+-Bipyridinedicarboxamide Complexes
Source: MDPI journal article supplement (doi:10.3390/polym14245540), 2022-12-18
Supplement: s1 [file s1]

# Supplementary Material

## Structural features of Eu<sup>3+</sup> and Tb<sup>3+</sup>-bipyridinedicarboxamide complexes

Anna S. Miroshnichenko,<sup>1,2†</sup> Konstantin V. Deriabin,<sup>1†</sup> Artem A. Rashevskii,<sup>1</sup>  
Vitalii V. Suslonov,<sup>1</sup> Alexander S. Novikov,<sup>1,3</sup> Ivan S. Mukhin<sup>1,2,4</sup>, and Regina M. Islamova<sup>1\*</sup>

<sup>1</sup> Saint Petersburg State University, 7/9 Universitetskaya Emb., St. Petersburg, 199034, Russia;

<sup>2</sup> ITMO University, 49 Kronverksky Pr., St. Petersburg, 197101, Russia;

<sup>3</sup> Peoples' Friendship University of Russia (RUDN University), 6 Miklukho-Maklaya Str., Moscow, 117198, Russia;

<sup>4</sup> St. Petersburg Academic University, 8/3 Khlopina Str., St. Petersburg, 194021, Russia.

† These authors contributed equally.

\* Correspondence: r.islamova@spbu.ru (R.M.I.).

### Content

|                                                                          |     |
|--------------------------------------------------------------------------|-----|
| 1. NMR spectra.....                                                      | S1  |
| 2. X-ray diffraction.....                                                | S2  |
| 3. Mass-spectra.....                                                     | S4  |
| 4. Theoretical calculations .....                                        | S6  |
| 4.1. Theoretical calculations of the coordination bonding energies ..... | S6  |
| 4.2. Theoretical calculations of HOMO–LUMO energy gaps.....              | S10 |
| 4.3. Theoretical modeling of UV-vis absorption spectra.....              | S10 |
| 4.4. Computational details .....                                         | S10 |
| 5. Luminescent properties .....                                          | S17 |
| 6. References.....                                                       | S19 |

## 1. NMR spectra

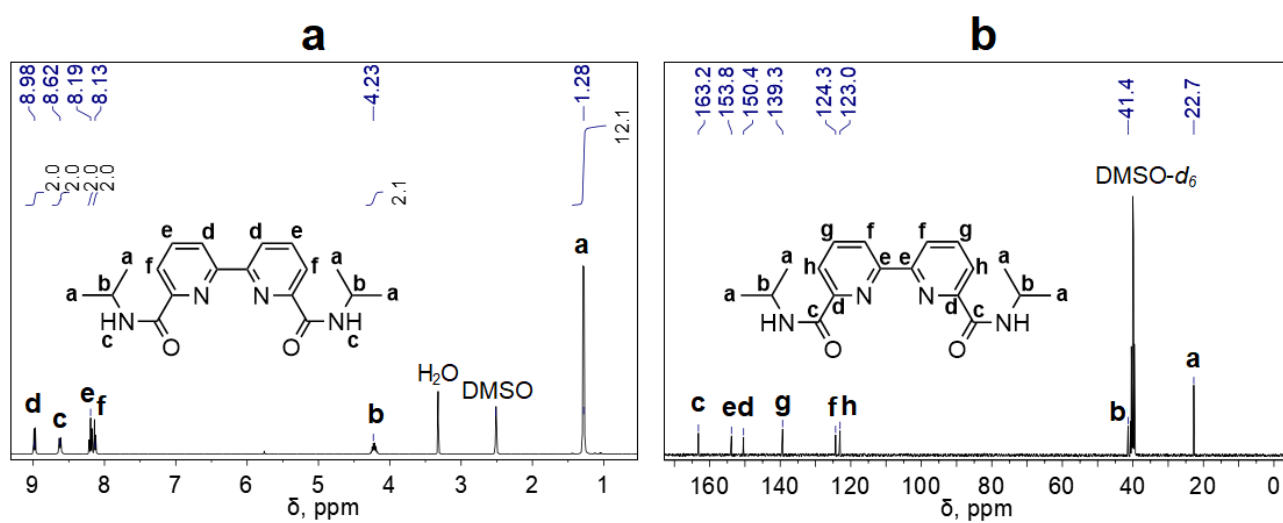

**Figure S1.**  $^1\text{H}$  (a) and  $^{13}\text{C}$  NMR (b) spectrum of BDCA ligand.

## 2. X-ray diffraction

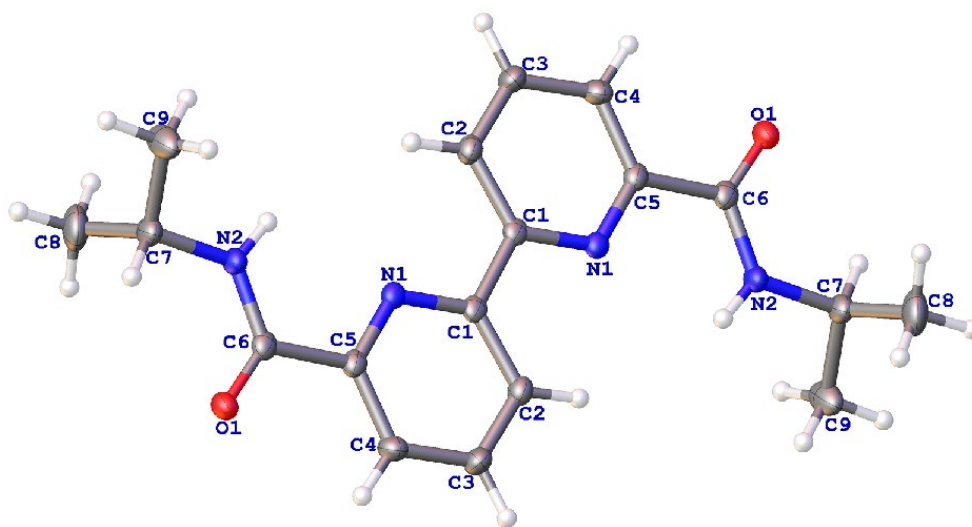

**Figure S2.** Molecular structures BDCA with thermal ellipsoids shown at the 50% probability level. The molecules of solvents are omitted for better representability.

**Table S1. Crystallographic information for structures of BDCA, [Eu(BDCA)<sub>2</sub>(H<sub>2</sub>O)]Cl<sub>3</sub>, and [Tb(BDCA)<sub>2</sub>(H<sub>2</sub>O)]Cl<sub>3</sub>.**

| Identification code                                 | BDCA                                                                               | [Eu(BDCA) <sub>2</sub> (H <sub>2</sub> O)]Cl <sub>3</sub>                        | [Tb(BDCA) <sub>2</sub> (H <sub>2</sub> O)]Cl <sub>3</sub>                         |
|-----------------------------------------------------|------------------------------------------------------------------------------------|----------------------------------------------------------------------------------|-----------------------------------------------------------------------------------|
| Empirical formula                                   | C <sub>18</sub> H <sub>22</sub> N <sub>4</sub> O <sub>2</sub>                      | C <sub>36</sub> H <sub>58</sub> Cl <sub>3</sub> EuN <sub>8</sub> O <sub>11</sub> | C <sub>36</sub> H <sub>58</sub> Cl <sub>3</sub> N <sub>8</sub> O <sub>11</sub> Tb |
| Formula weight                                      | 326.39                                                                             | 1037.21                                                                          | 1044.17                                                                           |
| Crystal system                                      | monoclinic                                                                         | monoclinic                                                                       | monoclinic                                                                        |
| Space group                                         | <i>P</i> 2 <sub>1</sub> / <i>c</i>                                                 | <i>P</i> 2/ <i>c</i>                                                             | <i>P</i> 2/ <i>c</i>                                                              |
| <i>a</i> , Å                                        | 9.2043(6)                                                                          | 11.2713(2)                                                                       | 11.2666(3)                                                                        |
| <i>b</i> , Å                                        | 11.4313(5)                                                                         | 15.3222(2)                                                                       | 15.2986(3)                                                                        |
| <i>c</i> , Å                                        | 9.6843(6)                                                                          | 14.2917(2)                                                                       | 14.2345(3)                                                                        |
| $\alpha$ , °                                        | 90                                                                                 | 90                                                                               | 90                                                                                |
| $\beta$ , °                                         | 116.612(8)                                                                         | 106.511(2)                                                                       | 106.335(3)                                                                        |
| $\gamma$ , °                                        | 90                                                                                 | 90                                                                               | 90                                                                                |
| Volume, Å <sup>3</sup>                              | 911.01(11)                                                                         | 2366.42(7)                                                                       | 2354.46(10)                                                                       |
| <i>Z</i>                                            | 2                                                                                  | 2                                                                                | 2                                                                                 |
| $\rho_{calc}$ , g·cm <sup>-3</sup>                  | 1.190                                                                              | 1.456                                                                            | 1.473                                                                             |
| $\mu$ , mm <sup>-1</sup>                            | 0.644                                                                              | 11.555                                                                           | 9.465                                                                             |
| <i>F</i> (000)                                      | 348.0                                                                              | 1064.0                                                                           | 1068.0                                                                            |
| Crystal size, mm <sup>3</sup>                       | 0.15×0.1×0.1                                                                       | 0.12×0.06×0.04                                                                   | 0.1×0.08×0.06                                                                     |
| 2 $\theta$ range for data collection, °             | 10.75 to 139.938                                                                   | 5.768 to 139.982                                                                 | 5.776 to 149.96                                                                   |
| Index ranges                                        | -11 ≤ <i>h</i> ≤ 10,<br>-13 ≤ <i>k</i> ≤ 13,<br>-8 ≤ <i>l</i> ≤ 11                 | -13 ≤ <i>h</i> ≤ 13,<br>-16 ≤ <i>k</i> ≤ 18,<br>-17 ≤ <i>l</i> ≤ 17              | -14 ≤ <i>h</i> ≤ 13,<br>-19 ≤ <i>k</i> ≤ 15,<br>-17 ≤ <i>l</i> ≤ 17               |
| Reflections collected                               | 4303                                                                               | 17784                                                                            | 18261                                                                             |
| Independent reflections                             | 1723<br>[ <i>R</i> <sub>int</sub> = 0.1006,<br><i>R</i> <sub>sigma</sub> = 0.0721] | 4494 [ <i>R</i> <sub>int</sub> = 0.0746,<br><i>R</i> <sub>sigma</sub> = 0.0496]  | 4819 [ <i>R</i> <sub>int</sub> = 0.0479,<br><i>R</i> <sub>sigma</sub> = 0.0361]   |
| Data/restraints/parameters                          | 1723/0/111                                                                         | 4494/5/288                                                                       | 4819/7/284                                                                        |
| Goodness-of-fit on <i>F</i> <sup>2</sup>            | 1.058                                                                              | 1.034                                                                            | 1.034                                                                             |
| Final <i>R</i> indexes [ <i>I</i> ≥ 2σ( <i>I</i> )] | <i>R</i> <sub>1</sub> = 0.0741,<br><i>wR</i> <sub>2</sub> = 0.1998                 | <i>R</i> <sub>1</sub> = 0.0312,<br><i>wR</i> <sub>2</sub> = 0.0812               | <i>R</i> <sub>1</sub> = 0.0351,<br><i>wR</i> <sub>2</sub> = 0.0895                |
| Final <i>R</i> indexes [all data]                   | <i>R</i> <sub>1</sub> = 0.0826,<br><i>wR</i> <sub>2</sub> = 0.2166                 | <i>R</i> <sub>1</sub> = 0.0317,<br><i>wR</i> <sub>2</sub> = 0.0816               | <i>R</i> <sub>1</sub> = 0.0357,<br><i>wR</i> <sub>2</sub> = 0.0899                |
| Largest diff. peak/hole, e·Å <sup>-3</sup>          | 0.39/−0.43                                                                         | 0.69/−0.91                                                                       | 1.89/−1.11                                                                        |

### 3. Mass-spectra

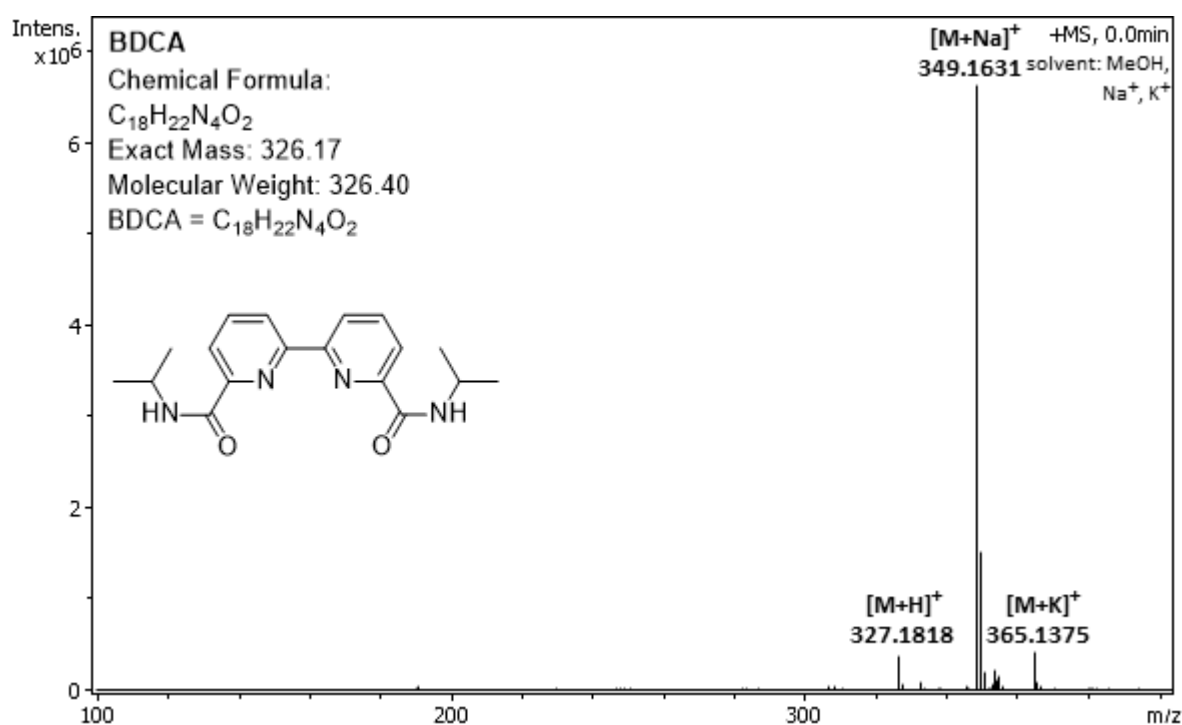

Figure S3. HRESIMS spectra of BDCA ligand.

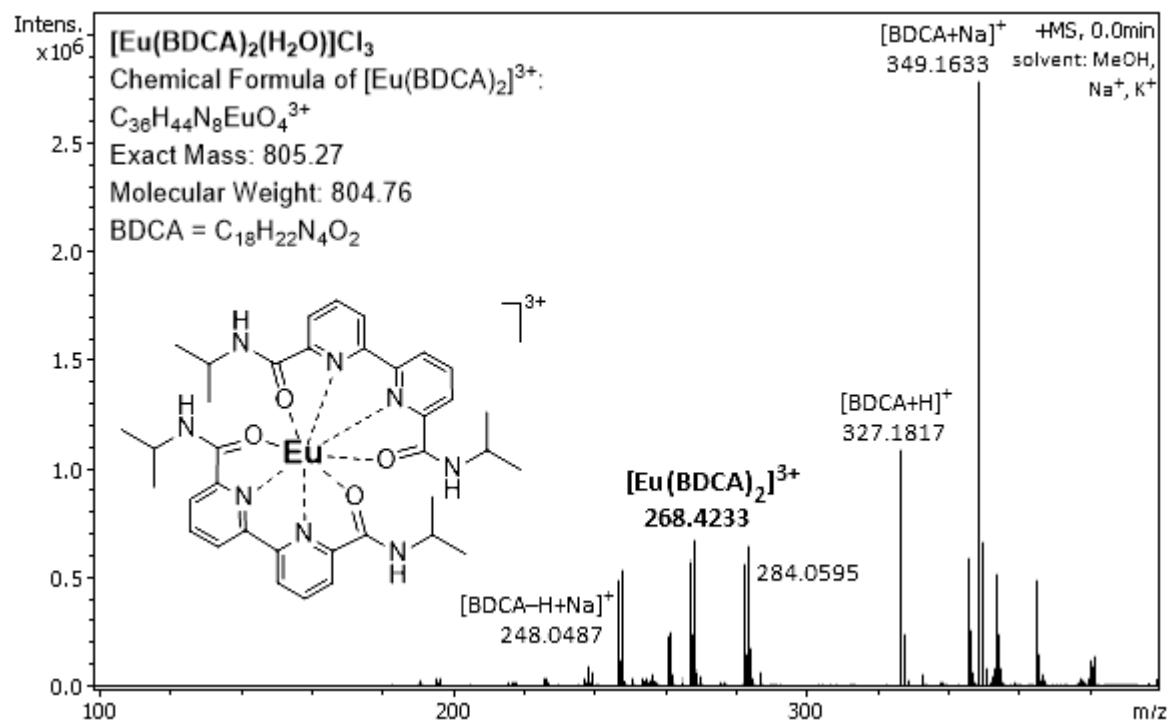

Figure S4. HRESIMS spectrum of  $[Eu(BDCA)_2(H_2O)]Cl_3$  complex.

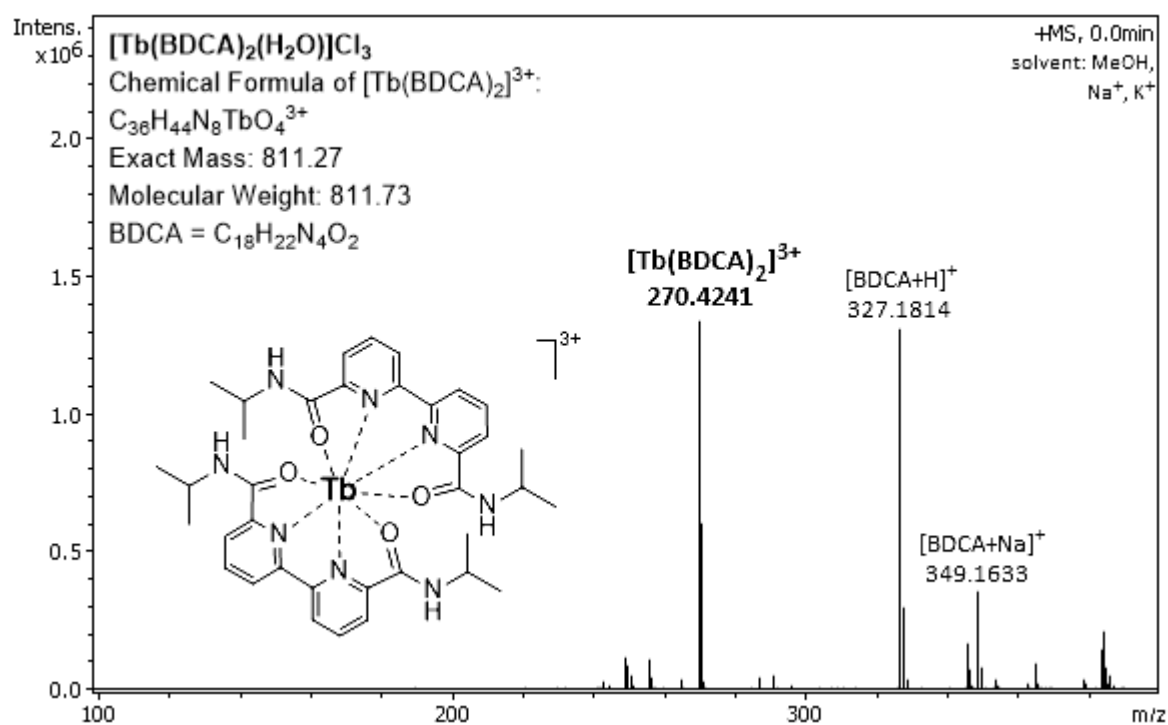

**Figure S5.** HRESIMS spectrum of [Tb(BDCA)<sub>2</sub>(H<sub>2</sub>O)]Cl<sub>3</sub> complex.

## 4. Theoretical calculations

### 4.1. Theoretical calculations of the coordination bonding energies

The QTAIM analysis demonstrates the presence of appropriate bond critical points (BCPs) (3, -1) for coordination bonds Ln–N<sub>Bipy</sub> and Ln–O in model structures [Eu(BDCA)<sub>2</sub>(H<sub>2</sub>O)]Cl<sub>3</sub> and [Tb(BDCA)<sub>2</sub>(H<sub>2</sub>O)]Cl<sub>3</sub> (Table S1). The low magnitude of the electron density (0.039–0.048 a.u.), positive values of the Laplacian of electron density (0.161–0.250 a.u.), and close to zero positive energy density (0.002–0.008 a.u.) in these BCPs are typical for closed shell contacts. The strength of coordination bonds Ln–N<sub>Bipy</sub> and Ln–O in [Eu(BDCA)<sub>2</sub>(H<sub>2</sub>O)]Cl<sub>3</sub> and [Tb(BDCA)<sub>2</sub>(H<sub>2</sub>O)]Cl<sub>3</sub> increases in the row: Ln–N<sub>Bipy</sub> (11.3–11.9 kcal·mol<sup>-1</sup>) < Ln–H<sub>2</sub>O (12.6–12.9 kcal·mol<sup>-1</sup>) < Ln–O (15.1–16.0 kcal·mol<sup>-1</sup>). The balance between the Lagrangian kinetic energy  $G(\mathbf{r})$  and potential energy density  $V(\mathbf{r})$  at the BCPs (3, -1) reveals the nature of these interactions, if the ratio  $-G(\mathbf{r})/V(\mathbf{r}) > 1$  is satisfied, than the nature of appropriate interaction is purely non-covalent, in case the  $-G(\mathbf{r})/V(\mathbf{r}) < 1$  some covalent component takes place [1]; based on this criterion one can state that all contacts listed in Table S1 are non-covalent. The Laplacian of electron density is typically decomposed into the sum of contributions along the three principal axes of maximal variation, giving the three eigenvalues of the Hessian matrix ( $\lambda_1$ ,  $\lambda_2$  and  $\lambda_3$ ), and the sign of  $\lambda_2$  can be utilized to distinguish bonding (attractive,  $\lambda_2 < 0$ ) interactions from non-bonding ones (repulsive,  $\lambda_2 > 0$ ) [2,3]. Thus, all coordination bonds Ln–N<sub>Bipy</sub> and Ln–O in model structures [Eu(BDCA)<sub>2</sub>(H<sub>2</sub>O)]Cl<sub>3</sub> and [Tb(BDCA)<sub>2</sub>(H<sub>2</sub>O)]Cl<sub>3</sub> are attractive (Table S1).

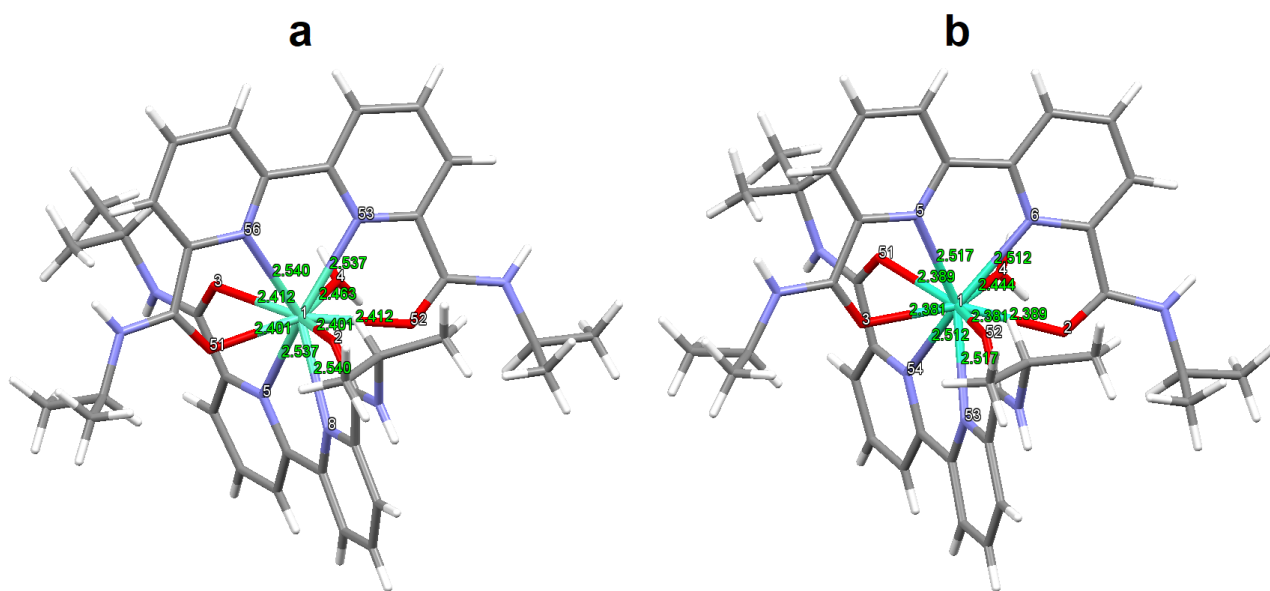

**Figure S6.** Model structures [Eu(BDCA)<sub>2</sub>(H<sub>2</sub>O)]Cl<sub>3</sub> (a) and [Tb(BDCA)<sub>2</sub>(H<sub>2</sub>O)]Cl<sub>3</sub> (b). Length of coordination bonds Ln–O and Ln–N<sub>Bipy</sub> (Ln = Eu, Tb) are indicated in Å.

**Table S2.** Values of the density of all electrons —  $\rho(r)$ , Laplacian of electron density —  $\nabla^2\rho(r)$  and appropriate  $\lambda_2$  eigenvalues, energy density —  $H_b$ , potential energy density —  $V(r)$ , Lagrangian kinetic energy —  $G(r)$ , and electron localization function —  $ELF$  (a.u.) at the bond critical points (3, -1), corresponding to coordination bonds Ln–O and Ln–N<sub>Bipy</sub> (Ln = Eu, Tb) in model structures [Eu(BDCA)<sub>2</sub>(H<sub>2</sub>O)]Cl<sub>3</sub> and [Tb(BDCA)<sub>2</sub>(H<sub>2</sub>O)]Cl<sub>3</sub>, as well as estimated energies for these contacts  $E_{int}$  (kcal·mol<sup>-1</sup>) and bond lengths —  $l$  (Å).

| Contact*                                                  | $\rho(r)$ | $\nabla^2\rho(r)$ | $\lambda_2$ | $H_b$ | $V(r)$ | $G(r)$ | $ELF$ | $E_{int}$ | $l, \text{Å}$ |
|-----------------------------------------------------------|-----------|-------------------|-------------|-------|--------|--------|-------|-----------|---------------|
| [Eu(BDCA) <sub>2</sub> (H <sub>2</sub> O)]Cl <sub>3</sub> |           |                   |             |       |        |        |       |           |               |
| Eu1–O4                                                    | 0.039     | 0.209             | –0.039      | 0.006 | –0.040 | 0.046  | 0.071 | 12.6      | 2.463         |
| Eu1–O51                                                   | 0.048     | 0.229             | –0.048      | 0.003 | –0.050 | 0.053  | 0.105 | 15.7      | 2.401         |
| Eu1–O2                                                    | 0.048     | 0.229             | –0.048      | 0.003 | –0.050 | 0.053  | 0.105 | 15.7      | 2.401         |
| Eu1–O3                                                    | 0.047     | 0.225             | –0.047      | 0.005 | –0.048 | 0.052  | 0.101 | 15.1      | 2.412         |
| Eu1–O52                                                   | 0.047     | 0.225             | –0.047      | 0.005 | –0.048 | 0.052  | 0.101 | 15.1      | 2.412         |
| Eu1–N56                                                   | 0.042     | 0.161             | –0.042      | 0.002 | –0.036 | 0.038  | 0.125 | 11.3      | 2.540         |
| Eu1–N8                                                    | 0.042     | 0.161             | –0.042      | 0.002 | –0.036 | 0.038  | 0.125 | 11.3      | 2.540         |
| Eu1–N53                                                   | 0.042     | 0.165             | –0.042      | 0.002 | –0.037 | 0.039  | 0.123 | 11.6      | 2.537         |
| Eu1–N5                                                    | 0.042     | 0.165             | –0.042      | 0.002 | –0.037 | 0.039  | 0.123 | 11.6      | 2.537         |
| [Tb(BDCA) <sub>2</sub> (H <sub>2</sub> O)]Cl <sub>3</sub> |           |                   |             |       |        |        |       |           |               |
| Tb1–O4                                                    | 0.039     | 0.225             | –0.039      | 0.008 | –0.041 | 0.049  | 0.065 | 12.9      | 2.444         |
| Tb1–O3                                                    | 0.048     | 0.250             | –0.048      | 0.005 | –0.051 | 0.056  | 0.094 | 16.0      | 2.381         |
| Tb1–O52                                                   | 0.048     | 0.250             | –0.048      | 0.005 | –0.051 | 0.056  | 0.094 | 16.0      | 2.381         |
| Tb1–O51                                                   | 0.047     | 0.243             | –0.047      | 0.006 | –0.048 | 0.054  | 0.090 | 15.1      | 2.389         |
| Tb1–O2                                                    | 0.047     | 0.243             | –0.047      | 0.006 | –0.048 | 0.054  | 0.090 | 15.1      | 2.389         |
| Tb1–N5                                                    | 0.041     | 0.174             | –0.041      | 0.003 | –0.037 | 0.040  | 0.111 | 11.6      | 2.517         |
| Tb1–N53                                                   | 0.041     | 0.174             | –0.041      | 0.003 | –0.037 | 0.040  | 0.111 | 11.6      | 2.517         |
| Tb1–N6                                                    | 0.042     | 0.179             | –0.042      | 0.003 | –0.038 | 0.041  | 0.109 | 11.9      | 2.512         |
| Tb1–N54                                                   | 0.042     | 0.179             | –0.042      | 0.003 | –0.038 | 0.041  | 0.109 | 11.9      | 2.512         |

\* Numeration of atoms corresponds to their ordering in model structures [Eu(BDCA)<sub>2</sub>(H<sub>2</sub>O)]Cl<sub>3</sub> and [Tb(BDCA)<sub>2</sub>(H<sub>2</sub>O)]Cl<sub>3</sub> (see Figure S6),  $E_{int} \approx -V(r)/2$  [4].

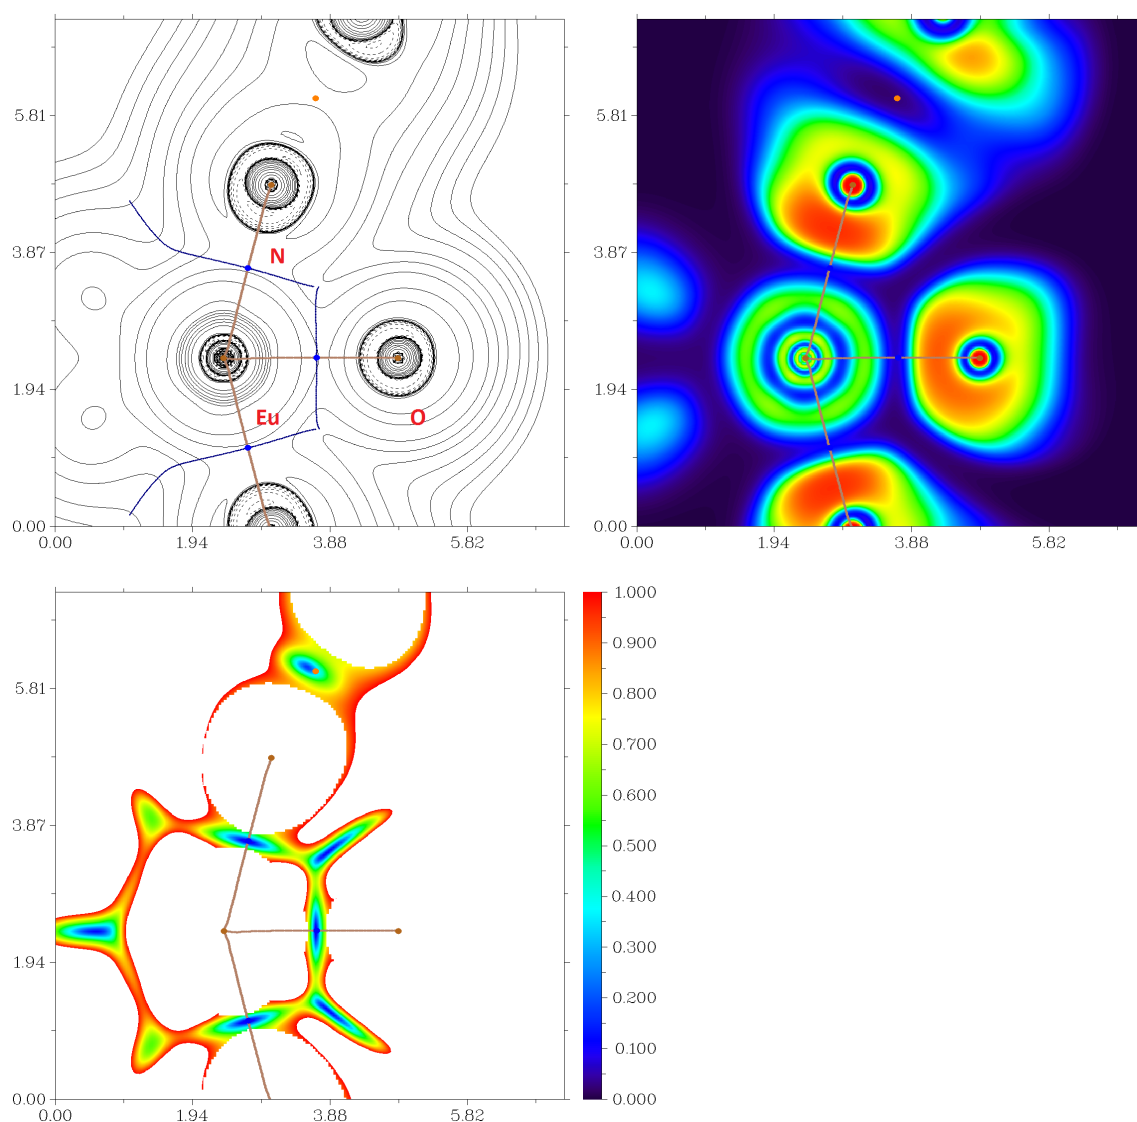

**Figure S7.** Contour line diagram of the Laplacian of electron density distribution  $\nabla^2\rho(r)$ , bond paths, and selected zero-flux surfaces (left panel), visualization of electron localization function (ELF, center panel) and reduced density gradient (RDG, right panel) analyses referring to coordination bonds Eu–O and Eu–N in model structure  $[\text{Eu}(\text{BDCA})_2(\text{H}_2\text{O})]\text{Cl}_3$ . Bond critical points (3, –1) are shown in blue, nuclear critical points (3, –3) — in pale brown, ring critical points (3, +1) — in orange, bond paths are shown as pale brown lines, length units – Å, and the color scale for the ELF and RDG maps is presented in a.u.



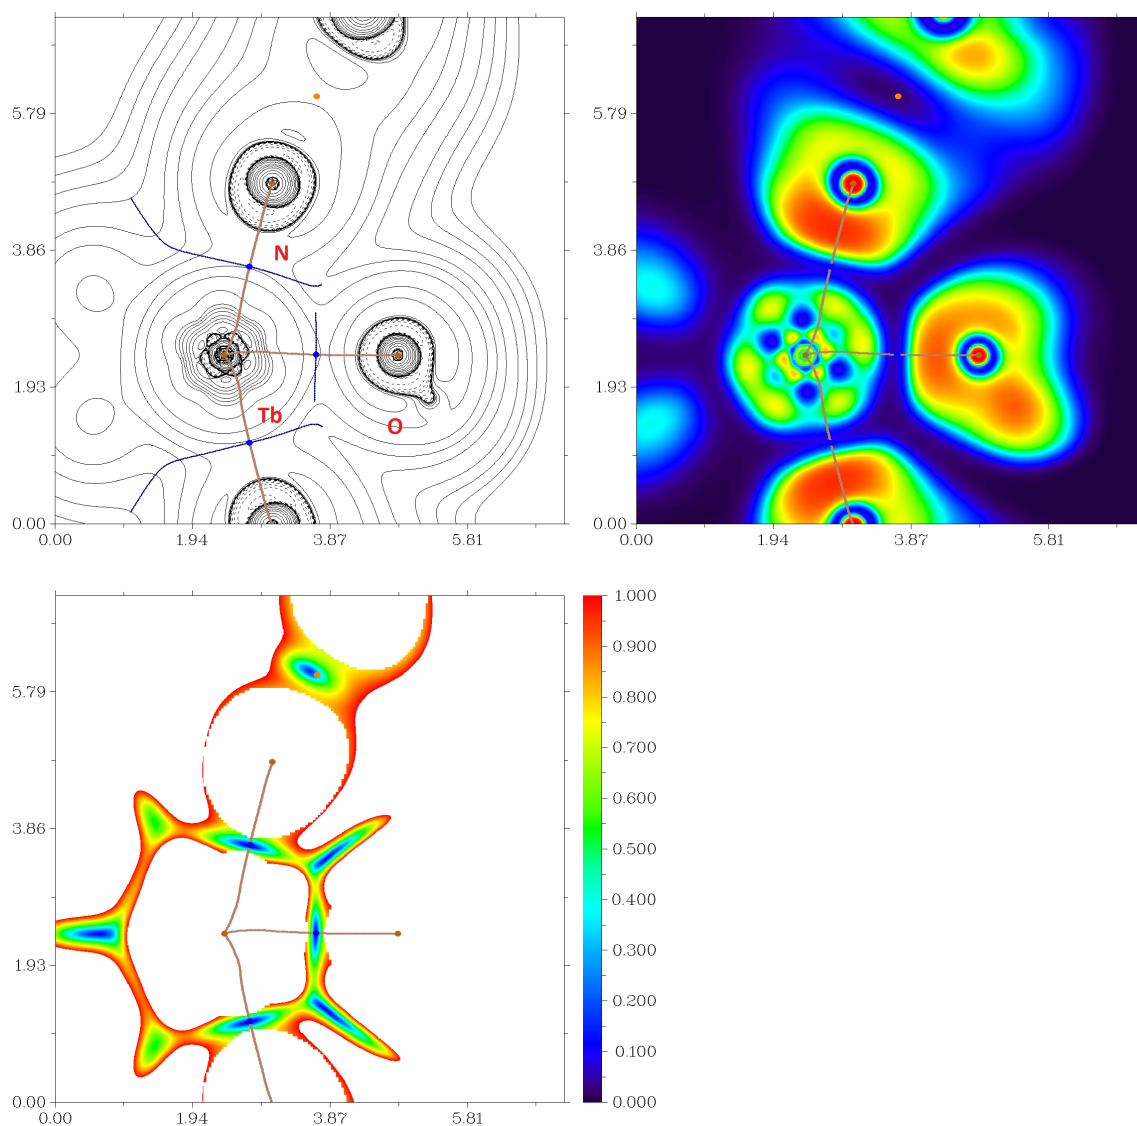

**Figure S8.** Contour line diagram of the Laplacian of electron density distribution  $\nabla^2\rho(r)$ , bond paths, and selected zero-flux surfaces (left panel), visualization of electron localization function (ELF, center panel) and reduced density gradient (RDG, right panel) analyses referring to coordination bonds Tb–O and Tb–N in model structure  $[\text{Tb}(\text{BDCA})_2(\text{H}_2\text{O})]\text{Cl}_3$ . Bond critical points (3, –1) are shown in blue, nuclear critical points (3, –3) – in pale brown, ring critical points (3, +1) – in orange, bond paths are shown as pale brown lines, length units – Å, and the color scale for the ELF and RDG maps is presented in a.u.

## 4.2. Theoretical calculations of HOMO–LUMO energy gaps

The HOMO–LUMO energy gap is the difference between the energies of HOMO and LUMO. For  $[\text{Eu}(\text{BDCA})_2(\text{H}_2\text{O})]\text{Cl}_3$ ,  $E_{\text{HOMO}} = -16.43$  eV,  $E_{\text{LUMO}} = -8.93$  eV; for  $[\text{Tb}(\text{BDCA})_2(\text{H}_2\text{O})]\text{Cl}_3$ ,  $E_{\text{HOMO}} = -16.44$  eV,  $E_{\text{LUMO}} = -8.27$  eV, respectively.

## 4.3. Theoretical modeling of UV-vis absorption spectra

Results of TD-DFT calculations at the CAM-B3LYP/CEP-121G level of theory for model structure  $[\text{Eu}(\text{BDCA})_2(\text{H}_2\text{O})]\text{Cl}_3$  (Figure S9) reveal that experimentally observed picks at 300 and 290 nm in the recorded UV-Vis spectra clearly associated with the ligand-to-metal charge transfer (LMCT).

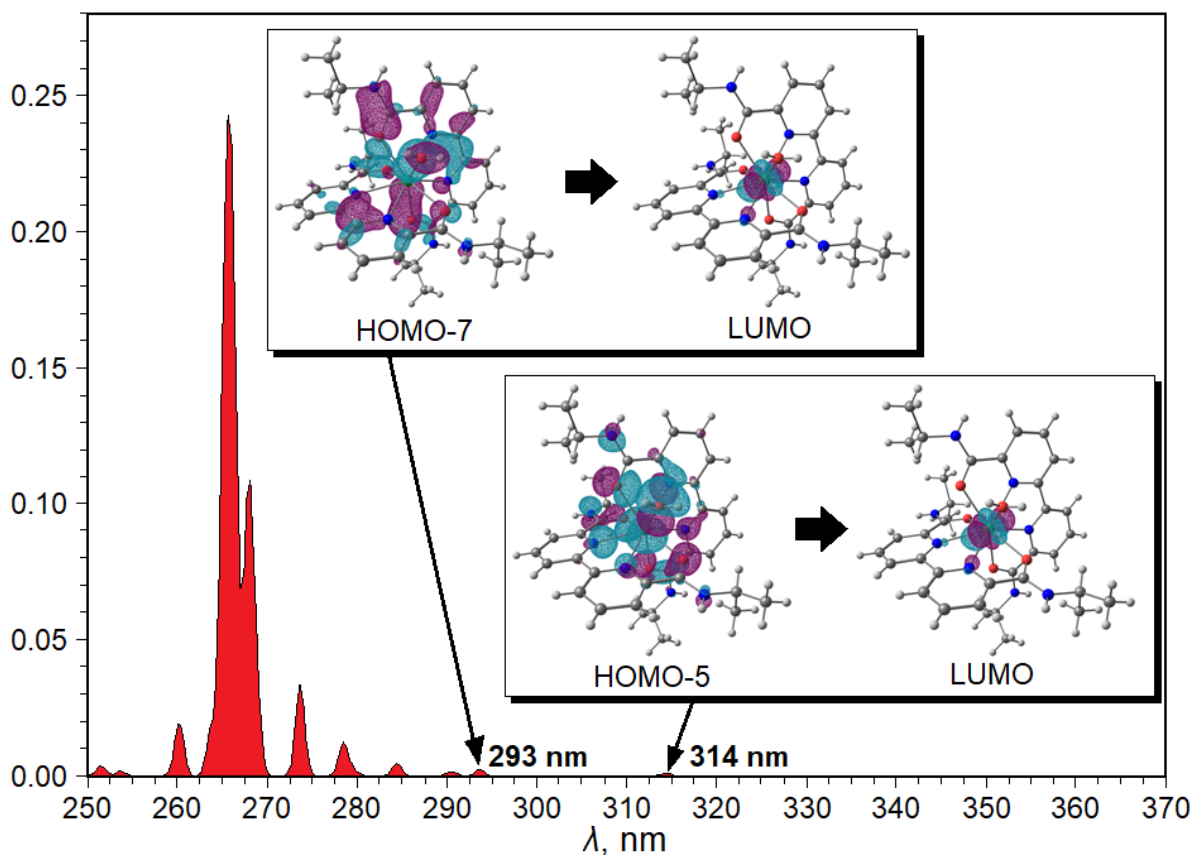

**Figure S9.** TD-DFT simulated UV-Vis spectrum of model structure  $[\text{Eu}(\text{BDCA})_2(\text{H}_2\text{O})]\text{Cl}_3$ .

## 4.4. Computational details

The DFT calculations were carried out using the dispersion-corrected hybrid functional  $\omega\text{B97XD}$  [5] with the help of Gaussian-09 program package [6] based on the experimental X-ray structures of  $[\text{Eu}(\text{BDCA})_2(\text{H}_2\text{O})]\text{Cl}_3$  and  $[\text{Tb}(\text{BDCA})_2(\text{H}_2\text{O})]\text{Cl}_3$ . The Douglas–Kroll–Hess 2<sup>nd</sup> order scalar relativistic calculations requested relativistic core Hamiltonian were carried out using the DZP-DKH basis sets [7–10] for all atoms. The topological analysis of the electron density distribution was performed by using the Multiwfn program (version 3.7) [11]. The Cartesian atomic coordinates for model structures are presented in the Table S2 and in the attached XYZ-files.

**Table S3. Cartesian atomic coordinates for model structures [Eu(BDCA)<sub>2</sub>(H<sub>2</sub>O)]Cl<sub>3</sub> and [Tb(BDCA)<sub>2</sub>(H<sub>2</sub>O)]Cl<sub>3</sub>.**

| Atom                                                        | X        | Y        | Z        |
|-------------------------------------------------------------|----------|----------|----------|
| <b>[Eu(BDCA)<sub>2</sub>(H<sub>2</sub>O)]Cl<sub>3</sub></b> |          |          |          |
| Eu                                                          | 4.620227 | 3.655264 | 3.425596 |
| O                                                           | 5.764424 | 5.565023 | 2.527679 |
| O                                                           | 2.536633 | 2.842728 | 4.328994 |
| O                                                           | 4.620227 | 1.192067 | 3.425596 |
| N                                                           | 4.666009 | 2.985071 | 5.872020 |
| N                                                           | 1.340112 | 1.666136 | 5.833105 |
| H                                                           | 1.336462 | 1.217058 | 6.589367 |
| N                                                           | 6.474228 | 4.611369 | 4.874760 |
| N                                                           | 7.467598 | 7.043615 | 2.451357 |
| H                                                           | 8.198338 | 7.345432 | 2.838449 |
| C                                                           | 5.767562 | 3.144115 | 6.623733 |
| C                                                           | 3.656082 | 2.243170 | 6.335983 |
| C                                                           | 6.782224 | 6.059930 | 3.029597 |
| C                                                           | 7.277230 | 5.555830 | 4.355988 |
| C                                                           | 6.764959 | 4.100221 | 6.087969 |
| C                                                           | 2.452619 | 2.256960 | 5.426144 |
| C                                                           | 5.909625 | 2.508244 | 7.855577 |
| H                                                           | 6.699003 | 2.623467 | 8.372088 |
| C                                                           | 7.879165 | 4.520049 | 6.804604 |
| H                                                           | 8.070111 | 4.143874 | 7.655632 |
| C                                                           | 3.717265 | 1.576654 | 7.555495 |
| H                                                           | 2.988059 | 1.051731 | 7.864511 |
| C                                                           | 0.103933 | 1.752860 | 5.026035 |
| H                                                           | 0.352005 | 1.703951 | 4.058838 |
| C                                                           | 8.706771 | 5.486880 | 6.267471 |
| H                                                           | 9.475049 | 5.779319 | 6.743793 |
| C                                                           | 8.402361 | 6.029286 | 5.020554 |
| H                                                           | 8.948983 | 6.704780 | 4.635983 |
| C                                                           | 7.032584 | 7.635052 | 1.181146 |
| H                                                           | 6.152515 | 7.230791 | 0.931077 |

|   |           |           |           |
|---|-----------|-----------|-----------|
| C | 4.882089  | 1.706893  | 8.310496  |
| H | 4.968820  | 1.243611  | 9.135900  |
| C | -0.560383 | 3.084359  | 5.282269  |
| H | -0.761435 | 3.171098  | 6.238339  |
| H | -1.393433 | 3.138967  | 4.768443  |
| H | 0.040275  | 3.808226  | 5.008537  |
| C | -0.785423 | 0.583776  | 5.349411  |
| H | -0.362177 | -0.244159 | 5.040395  |
| H | -1.649463 | 0.696287  | 4.900740  |
| H | -0.924705 | 0.537304  | 6.318663  |
| C | 8.030771  | 7.304093  | 0.102768  |
| H | 8.911214  | 7.651830  | 0.354234  |
| H | 7.746792  | 7.712920  | -0.741874 |
| H | 8.082368  | 6.331409  | -0.007112 |
| C | 6.835732  | 9.132031  | 1.366128  |
| H | 6.143785  | 9.289697  | 2.042477  |
| H | 6.558829  | 9.533166  | 0.516210  |
| H | 7.677779  | 9.538422  | 1.660318  |
| H | 5.193319  | 0.679172  | 3.831762  |
| H | 3.930695  | 0.680750  | 3.284900  |
| O | 3.476030  | 5.565023  | 4.323513  |
| O | 6.703821  | 2.842728  | 2.522198  |
| N | 4.574445  | 2.985071  | 0.979172  |
| N | 7.900341  | 1.666136  | 1.018087  |
| H | 7.903991  | 1.217058  | 0.261825  |
| N | 2.766226  | 4.611369  | 1.976432  |
| N | 1.772855  | 7.043615  | 4.399836  |
| H | 1.042115  | 7.345432  | 4.012743  |
| C | 3.472891  | 3.144115  | 0.227460  |
| C | 5.584372  | 2.243170  | 0.515210  |
| C | 2.458230  | 6.059930  | 3.821595  |
| C | 1.963223  | 5.555830  | 2.495204  |
| C | 2.475494  | 4.100221  | 0.763223  |
| C | 6.787835  | 2.256960  | 1.425048  |
| C | 3.330829  | 2.508244  | -1.004385 |

|                                                           |           |           |           |
|-----------------------------------------------------------|-----------|-----------|-----------|
| H                                                         | 2.541451  | 2.623467  | −1.520896 |
| C                                                         | 1.361289  | 4.520049  | 0.046588  |
| H                                                         | 1.170342  | 4.143874  | −0.804440 |
| C                                                         | 5.523189  | 1.576654  | −0.704303 |
| H                                                         | 6.252394  | 1.051731  | −1.013319 |
| C                                                         | 9.136521  | 1.752860  | 1.825158  |
| H                                                         | 8.888449  | 1.703951  | 2.792354  |
| C                                                         | 0.533682  | 5.486880  | 0.583722  |
| H                                                         | −0.234595 | 5.779319  | 0.107399  |
| C                                                         | 0.838092  | 6.029286  | 1.830639  |
| H                                                         | 0.291470  | 6.704780  | 2.215210  |
| C                                                         | 2.207870  | 7.635052  | 5.670047  |
| H                                                         | 3.087939  | 7.230791  | 5.920115  |
| C                                                         | 4.358364  | 1.706893  | −1.459304 |
| H                                                         | 4.271634  | 1.243611  | −2.284708 |
| C                                                         | 9.800836  | 3.084359  | 1.568923  |
| H                                                         | 10.001889 | 3.171098  | 0.612853  |
| H                                                         | 10.633886 | 3.138967  | 2.082749  |
| H                                                         | 9.200179  | 3.808226  | 1.842656  |
| C                                                         | 10.025876 | 0.583776  | 1.501781  |
| H                                                         | 9.602630  | −0.244159 | 1.810798  |
| H                                                         | 10.889917 | 0.696287  | 1.950452  |
| H                                                         | 10.165158 | 0.537304  | 0.532529  |
| C                                                         | 1.209683  | 7.304093  | 6.748424  |
| H                                                         | 0.329239  | 7.651830  | 6.496958  |
| H                                                         | 1.493661  | 7.712920  | 7.593067  |
| H                                                         | 1.158086  | 6.331409  | 6.858304  |
| C                                                         | 2.404721  | 9.132031  | 5.485065  |
| H                                                         | 3.096669  | 9.289697  | 4.808715  |
| H                                                         | 2.681625  | 9.533166  | 6.334982  |
| H                                                         | 1.562675  | 9.538422  | 5.190874  |
| <hr/>                                                     |           |           |           |
| [Tb(BDCA) <sub>2</sub> (H <sub>2</sub> O)]Cl <sub>3</sub> |           |           |           |
| <hr/>                                                     |           |           |           |
| Tb                                                        | 2.630678  | 11.303218 | 10.244929 |
| O                                                         | 4.698846  | 10.493004 | 9.365914  |

|   |           |           |           |
|---|-----------|-----------|-----------|
| O | 1.506795  | 13.189382 | 11.165743 |
| O | 2.630678  | 8.858960  | 10.244929 |
| N | 0.779476  | 12.243470 | 8.822933  |
| N | 2.574295  | 10.623501 | 7.827126  |
| N | 5.899817  | 9.313482  | 7.870701  |
| H | 5.903494  | 8.859970  | 7.116619  |
| N | -0.186748 | 14.676712 | 11.239370 |
| H | -0.917456 | 14.975448 | 10.850732 |
| C | 3.585903  | 9.884578  | 7.358591  |
| C | 1.475168  | 10.782759 | 7.075831  |
| C | 3.529205  | 9.223526  | 6.137395  |
| H | 4.261432  | 8.704276  | 5.826865  |
| C | 1.335395  | 10.144502 | 5.838244  |
| H | 0.545864  | 10.256533 | 5.322746  |
| C | -0.637752 | 12.157797 | 6.892788  |
| H | -0.835135 | 11.781299 | 6.043320  |
| C | 4.784254  | 9.900795  | 8.271073  |
| C | 0.487344  | 13.697143 | 10.661556 |
| C | 0.481523  | 11.740452 | 7.609933  |
| C | 7.138918  | 9.405579  | 8.667210  |
| H | 6.895472  | 9.365987  | 9.636776  |
| C | -0.013326 | 13.191065 | 9.340643  |
| C | -1.454008 | 13.126199 | 7.440550  |
| H | -2.223872 | 13.422716 | 6.970008  |
| C | -1.145236 | 13.663180 | 8.678138  |
| H | -1.691024 | 14.336073 | 9.067322  |
| C | 2.363680  | 9.348974  | 5.382003  |
| H | 2.278824  | 8.888196  | 4.556261  |
| C | 0.241731  | 15.283301 | 12.502911 |
| H | 1.123852  | 14.884880 | 12.755770 |
| C | 8.021988  | 8.224527  | 8.348934  |
| H | 7.591582  | 7.401141  | 8.659233  |
| H | 8.885977  | 8.331801  | 8.798823  |
| H | 8.162873  | 8.174424  | 7.379873  |
| C | 7.801797  | 10.727378 | 8.396744  |

|   |           |           |           |
|---|-----------|-----------|-----------|
| H | 8.086702  | 10.764630 | 7.460016  |
| H | 8.582695  | 10.827339 | 8.980254  |
| H | 7.167137  | 11.453572 | 8.573926  |
| C | -0.752617 | 14.952852 | 13.592972 |
| H | -1.634792 | 15.301935 | 13.345755 |
| H | -0.463078 | 15.363665 | 14.434040 |
| H | -0.805035 | 13.981238 | 13.703972 |
| C | 0.434832  | 16.771855 | 12.313039 |
| H | 1.122320  | 16.928819 | 11.632775 |
| H | 0.715446  | 17.176059 | 13.160649 |
| H | -0.409882 | 17.176442 | 12.022807 |
| H | 3.321125  | 8.386402  | 10.483745 |
| H | 2.249298  | 8.387289  | 9.621313  |
| O | 0.562511  | 10.493004 | 11.123944 |
| O | 3.754562  | 13.189382 | 9.324115  |
| N | 4.481881  | 12.243470 | 11.666925 |
| N | 2.687062  | 10.623501 | 12.662732 |
| N | -0.638461 | 9.313482  | 12.619157 |
| H | -0.642137 | 8.859970  | 13.373239 |
| N | 5.448105  | 14.676712 | 9.250488  |
| H | 6.178813  | 14.975448 | 9.639126  |
| C | 1.675454  | 9.884578  | 13.131267 |
| C | 3.786189  | 10.782759 | 13.414027 |
| C | 1.732152  | 9.223526  | 14.352463 |
| H | 0.999925  | 8.704276  | 14.662993 |
| C | 3.925962  | 10.144502 | 14.651615 |
| H | 4.715493  | 10.256533 | 15.167112 |
| C | 5.899109  | 12.157797 | 13.597070 |
| H | 6.096492  | 11.781299 | 14.446538 |
| C | 0.477103  | 9.900795  | 12.218785 |
| C | 4.774013  | 13.697143 | 9.828302  |
| C | 4.779834  | 11.740452 | 12.879925 |
| C | -1.877561 | 9.405579  | 11.822648 |
| H | -1.634115 | 9.365987  | 10.853082 |
| C | 5.274683  | 13.191065 | 11.149215 |

|   |           |           |           |
|---|-----------|-----------|-----------|
| C | 6.715365  | 13.126199 | 13.049308 |
| H | 7.485229  | 13.422716 | 13.519850 |
| C | 6.406592  | 13.663180 | 11.811720 |
| H | 6.952381  | 14.336073 | 11.422536 |
| C | 2.897677  | 9.348974  | 15.107855 |
| H | 2.982533  | 8.888196  | 15.933597 |
| C | 5.019626  | 15.283301 | 7.986947  |
| H | 4.137505  | 14.884880 | 7.734088  |
| C | -2.760631 | 8.224527  | 12.140924 |
| H | -2.330225 | 7.401141  | 11.830625 |
| H | -3.624620 | 8.331801  | 11.691035 |
| H | -2.901516 | 8.174424  | 13.109985 |
| C | -2.540440 | 10.727378 | 12.093114 |
| H | -2.825345 | 10.764630 | 13.029842 |
| H | -3.321338 | 10.827339 | 11.509604 |
| H | -1.905780 | 11.453572 | 11.915932 |
| C | 6.013974  | 14.952852 | 6.896886  |
| H | 6.896149  | 15.301935 | 7.144103  |
| H | 5.724435  | 15.363665 | 6.055819  |
| H | 6.066392  | 13.981238 | 6.785886  |
| C | 4.826525  | 16.771855 | 8.176819  |
| H | 4.139037  | 16.928819 | 8.857083  |
| H | 4.545911  | 17.176059 | 7.329209  |
| H | 5.671239  | 17.176442 | 8.467051  |

---



## 5. Luminescent properties

Excitation spectra of  $[\text{Eu}(\text{BDCA})_2(\text{H}_2\text{O})]\text{Cl}_3$  and  $[\text{Tb}(\text{BDCA})_2(\text{H}_2\text{O})]\text{Cl}_3$  were measured at emission wavelengths of 617 nm and 554 nm, respectively. Both  $[\text{Eu}(\text{BDCA})_2(\text{H}_2\text{O})]\text{Cl}_3$  and  $[\text{Tb}(\text{BDCA})_2(\text{H}_2\text{O})]\text{Cl}_3$  show a broad excitation peak centered at 335 nm (Figure S10, a, b). However, for  $[\text{Eu}(\text{BDCA})_2(\text{H}_2\text{O})]\text{Cl}_3$  we observe a signal with low intensity at 400 nm, which could correspond to the ligand energy transition  $\text{S}_1 \rightarrow \text{T}_1$  (Figure S10, a). After encapsulation in PEG excitation spectra of  $[\text{Eu}(\text{BDCA})_2(\text{H}_2\text{O})]\text{Cl}_3$  and  $[\text{Tb}(\text{BDCA})_2(\text{H}_2\text{O})]\text{Cl}_3$  show a narrow peak at 320 nm (Figure S10, c, d). This could be explained by influence of the polymer matrix (PEG) [12].

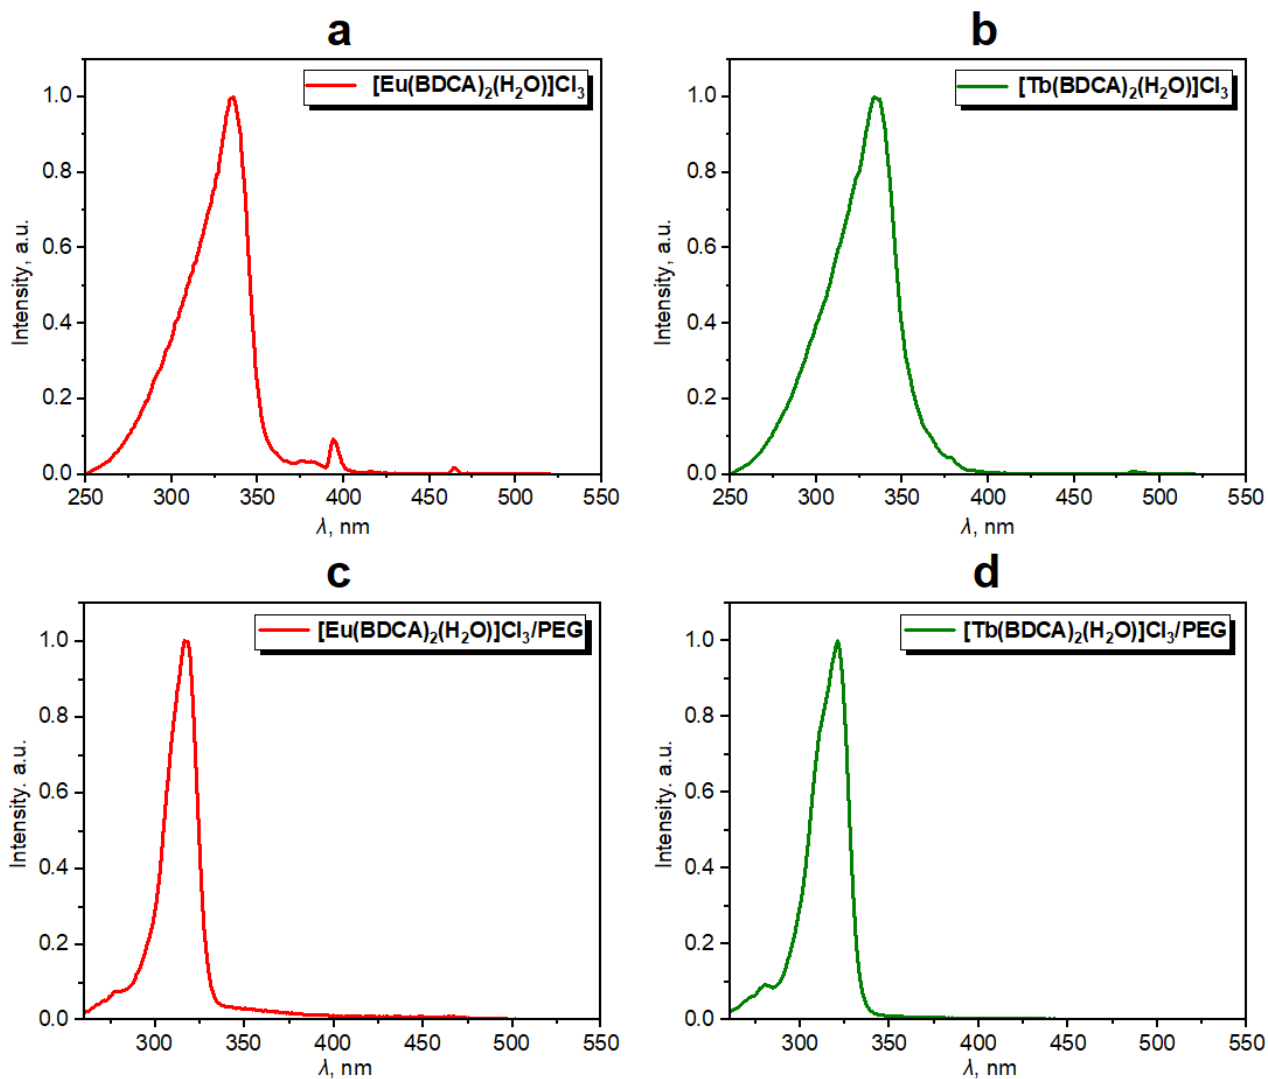

**Figure S10.** Excitation spectra of raw  $[\text{Eu}(\text{BDCA})_2(\text{H}_2\text{O})]\text{Cl}_3$  (a),  $[\text{Tb}(\text{BDCA})_2(\text{H}_2\text{O})]\text{Cl}_3$  (b), and the encapsulated complexes in PEG (c, d).

PL lifetime (Figure S11) for both raw and encapsulated in PEG  $[\text{Eu}(\text{BDCA})_2(\text{H}_2\text{O})]\text{Cl}_3$  and  $[\text{Tb}(\text{BDCA})_2(\text{H}_2\text{O})]\text{Cl}_3$  were measured at emission wavelengths 617 nm and 554 nm, respectively. Excitation wavelength was 335 nm for the raw and 320 nm for the encapsulated complexes.

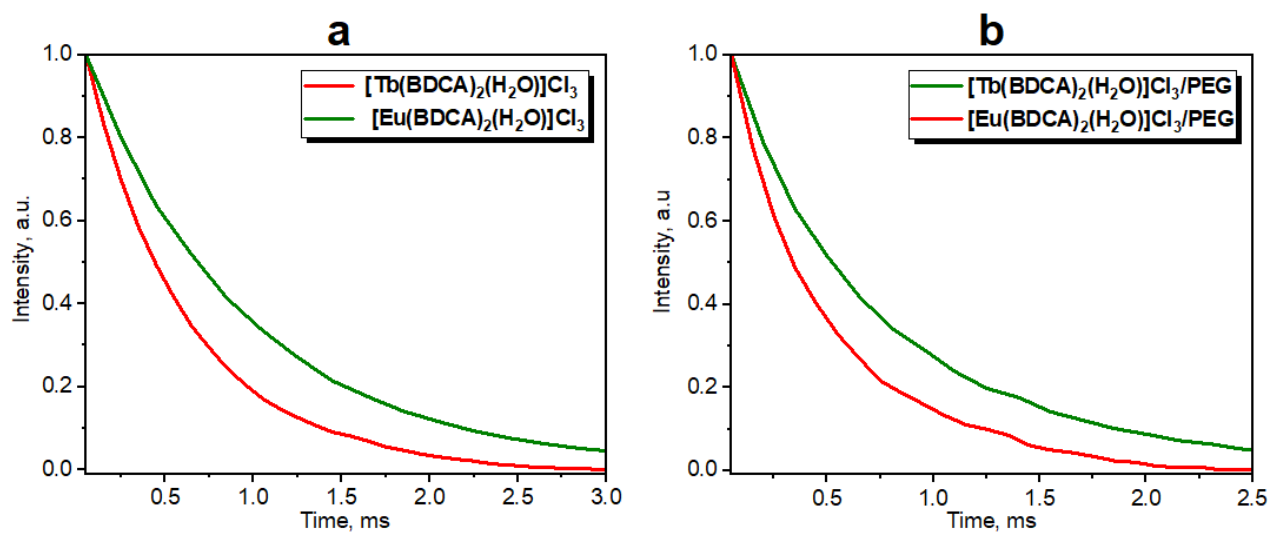

**Figure S11.** Luminescence lifetime decay for [Eu(BDCA)<sub>2</sub>(H<sub>2</sub>O)]Cl<sub>3</sub> (a), [Tb(BDCA)<sub>2</sub>(H<sub>2</sub>O)]Cl<sub>3</sub> (b), and the encapsulated complexes in PEG (c, d).

Lifetime value was estimated by exponential approximation according to the Equation (1):

$$y = A_1 \cdot \exp(-x/t_1) + y_0, \quad (1)$$

where  $y_0 = 0$ ,  $t_1$  — decay time constant,  $A_1$  — corresponding intensity.

## 6. References

1. Espinosa, E.; Alkorta, I.; Elguero, J.; Molins, E. From Weak to Strong Interactions: A Comprehensive Analysis of the Topological and Energetic Properties of the Electron Density Distribution Involving X–H...F–Y Systems. *The Journal of Chemical Physics* **2002**, *117*, 5529–5542, doi:10.1063/1.1501133.
2. Johnson, E.R.; Keinan, S.; Mori-Sánchez, P.; Contreras-García, J.; Cohen, A.J.; Yang, W. Revealing Noncovalent Interactions. *J. Am. Chem. Soc.* **2010**, *132*, 6498–6506, doi:10.1021/ja100936w.
3. Contreras-García, J.; Johnson, E.R.; Keinan, S.; Chaudret, R.; Piquemal, J.-P.; Beratan, D.N.; Yang, W. NCIPLOT: A Program for Plotting Noncovalent Interaction Regions. *J. Chem. Theory Comput.* **2011**, *7*, 625–632, doi:10.1021/ct100641a.
4. Espinosa, E.; Molins, E.; Lecomte, C. Hydrogen Bond Strengths Revealed by Topological Analyses of Experimentally Observed Electron Densities. *Chemical Physics Letters* **1998**, *285*, 170–173, doi:10.1016/S0009-2614(98)00036-0.
5. Chai, J.-D.; Head-Gordon, M. Long-Range Corrected Hybrid Density Functionals with Damped Atom–Atom Dispersion Corrections. *Phys. Chem. Chem. Phys.* **2008**, *10*, 6615, doi:10.1039/b810189b.
6. Frisch, M.J.; Trucks, G.W.; Schlegel, H.B.; Scuseria, G.E.; Robb, M.A.; Cheeseman, J.R.; Scalmani, G.; Barone, V.; Mennucci, B.; Petersson, G.A.; et al. *Gaussian 09*; Revision C.01.; Gaussian Inc.: Wallingford, CT, 2010;
7. Barros, C.L.; de Oliveira, P.J.P.; Jorge, F.E.; Canal Neto, A.; Campos, M. Gaussian Basis Set of Double Zeta Quality for Atoms Rb through Xe: Application in Non-Relativistic and Relativistic Calculations of Atomic and Molecular Properties. *Molecular Physics* **2010**, *108*, 1965–1972, doi:10.1080/00268976.2010.499377.
8. Jorge, F.E.; Canal Neto, A.; Camiletti, G.G.; Machado, S.F. Contracted Gaussian Basis Sets for Douglas–Kroll–Hess Calculations: Estimating Scalar Relativistic Effects of Some Atomic and Molecular Properties. *The Journal of Chemical Physics* **2009**, *130*, 064108, doi:10.1063/1.3072360.
9. Canal Neto, A.; Jorge, F.E. All-Electron Double Zeta Basis Sets for the Most Fifth-Row Atoms: Application in DFT Spectroscopic Constant Calculations. *Chemical Physics Letters* **2013**, *582*, 158–162, doi:10.1016/j.cplett.2013.07.045.
10. de Berrêdo, R.C.; Jorge, F.E. All-Electron Double Zeta Basis Sets for Platinum: Estimating Scalar Relativistic Effects on Platinum(II) Anticancer Drugs. *Journal of Molecular Structure: THEOCHEM* **2010**, *961*, 107–112, doi:10.1016/j.theochem.2010.09.007.
11. Lu, T.; Chen, F. Multiwfn: A Multifunctional Wavefunction Analyzer. *J. Comput. Chem.* **2012**, *33*, 580–592, doi:10.1002/jcc.22885.
12. *Luminescence of Lanthanide Ions in Coordination Compounds and Nanomaterials*; de Bettencourt-Dias, A., Ed.; John Wiley & Sons Ltd: Chichester, United Kingdom, 2014; ISBN 978-1-118-68276-0.
